# Supplementary material
Source: Springer Nature journal article supplement (https://www.springermedizin.de/resource/supplementary/12936_2011_1852_MOESM2_ESM.pdf/9541920)

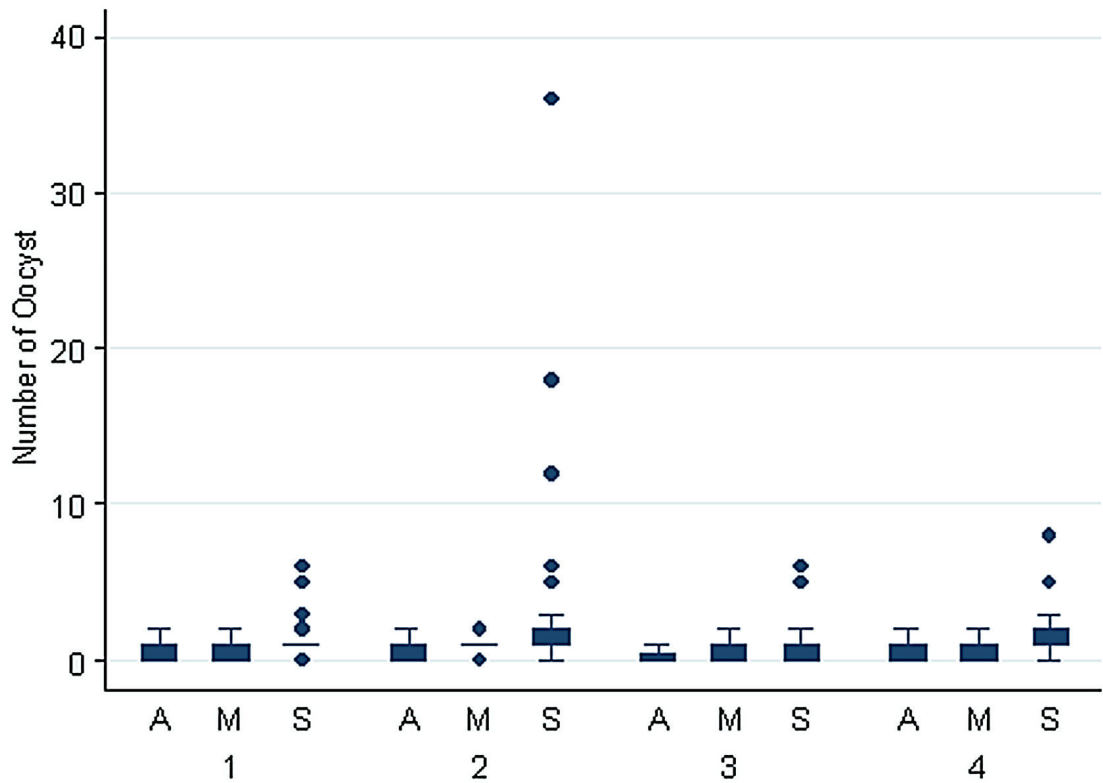

|                  |              |      |      |               |      |      |            |      |      |               |      |      |
|------------------|--------------|------|------|---------------|------|------|------------|------|------|---------------|------|------|
| Mean             | 0.68         | 0.76 | 1.35 | 0.68          | 0.88 | 3.2  | 0.25       | 0.38 | 0.81 | 0.72          | 0.57 | 1.74 |
| SEM              | 0.08         | 0.07 | 0.19 | 0.08          | 0.09 | 1.10 | 0.06       | 0.07 | 0.19 | 0.8           | 0.09 | 0.28 |
| Median           | 1            | 1    | 1    | 1             | 1    | 1    | 0          | 0    | 1    | 1             | 0    | 1    |
| K-W $\chi^2$ (P) | 11.5 (0.003) |      |      | 17.8 (0.0001) |      |      | 8.9 (0.01) |      |      | 19.5 (0.0001) |      |      |

Supplement: MOESM2 [file 9541920]
